# Supplementary material for: Fluorine substituted thiophene–quinoxalinecopolymer to reduce the HOMO level and increase the dielectric constant for high open-circuit voltage organic solar cells
Source: Royal Society of Chemistry journal article supplement (doi:10.1039/c2tc00327a), 2012-12-11
Supplement: c2tc00327a.pdf [file c2tc00327a.pdf]

## Supporting Materials

# Fluorine Substituted Thiophene-Quinoxaline Copolymer to Reduce HOMO Level and Increase Dielectric Constant for High Open-circuit Voltage Organic Solar Cell

Yunzhang Lu<sup>ab</sup>, Zhengguo Xiao<sup>a</sup>, Yongbo Yuan<sup>a</sup>, Haimei Wu<sup>c</sup>, Zhongwei An<sup>c</sup>, Yanbing Hou<sup>\*b</sup>,

Chao Gao<sup>\*c</sup> and Jinsong Huang<sup>\*a</sup>

<sup>a</sup>Department of Mechanical and Materials Engineering and Nebraska Center for Materials and Nanoscience, University of Nebraska-Lincoln, Lincoln, Nebraska 68588-0656, USA; E-mail: jhuang2@unl.edu

<sup>b</sup>Key laboratory of Luminescence and Optical Information, Ministry of Education, Institute of Optoelectronic Technology, Beijing Jiaotong University, Beijing, 100044, China; E-mail: ybhou@bjtu.edu.cn

<sup>c</sup>Xi'an Modern Chemistry Research Institute, 168 of East ZhangBa Road, Xi'an, Shaanxi, 710065, P.R.China; E-mail: chaogao74@gmail.com

## Contents

Scheme 1. Synthesis routine of FTQ.

Figure S1-S2. <sup>1</sup>H and <sup>13</sup>C NMR spectra of compound 2.

Figure S3-S4. <sup>1</sup>H and <sup>13</sup>C NMR spectra of compound 4.

Figure S5. <sup>1</sup>H NMR spectrum of FTQ.

Figure S6. AFM phase images of blend film with 5 and 30 min annealing (1 μm × 1 μm).

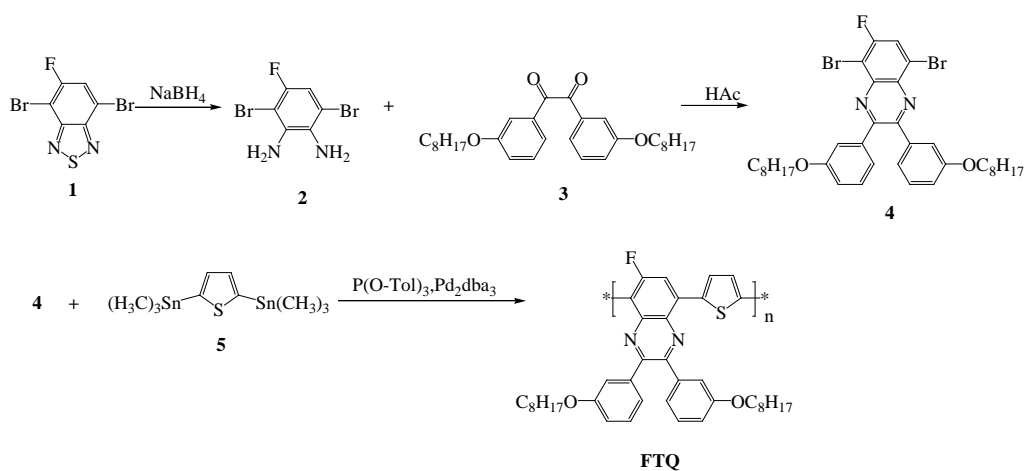

Scheme 1. Synthesis routine of FTQ

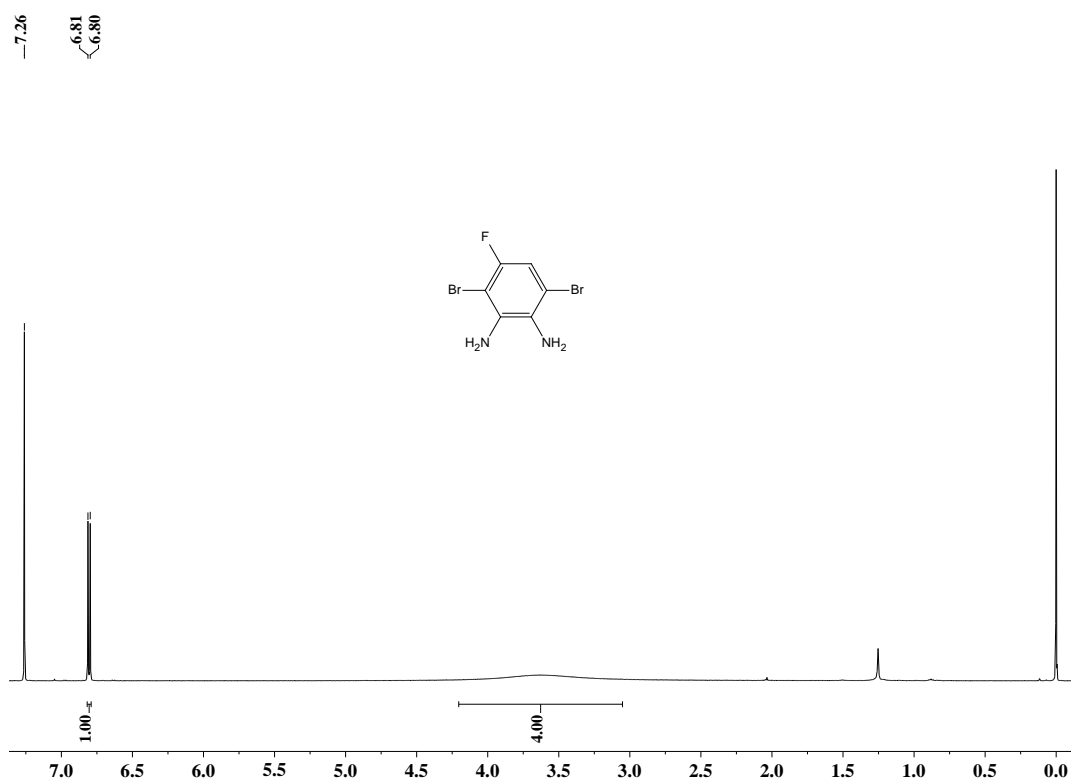

Figure S1. <sup>1</sup>H NMR spectrum of compound 2.

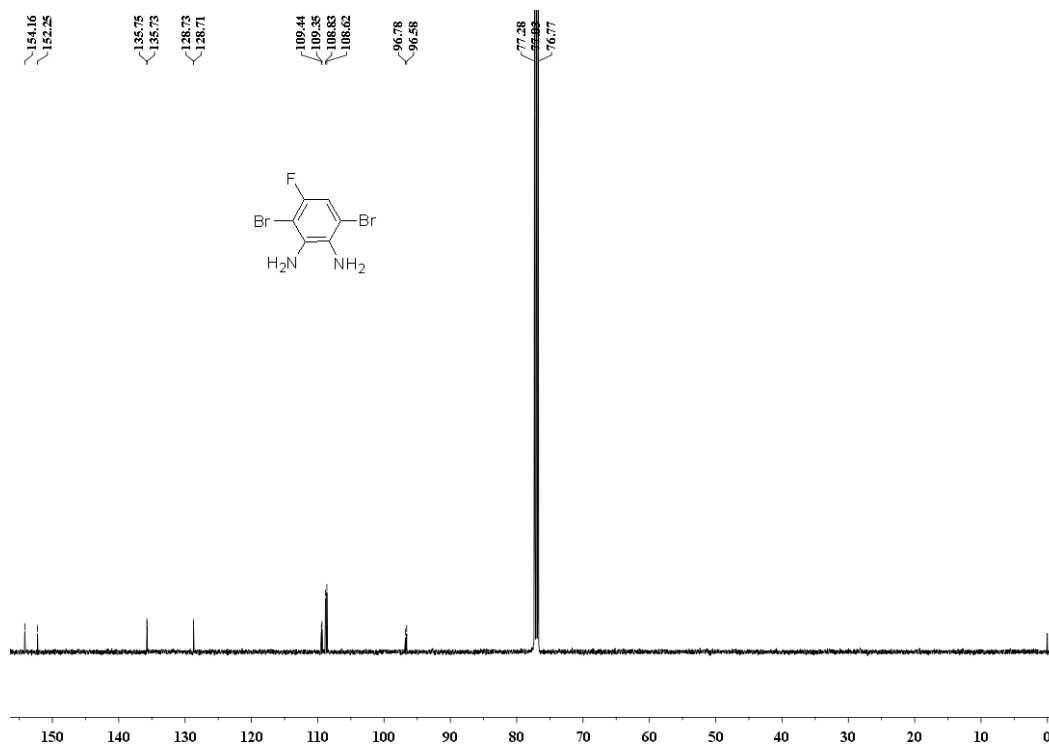

Figure S2. <sup>13</sup>C NMR spectrum of compound 2.

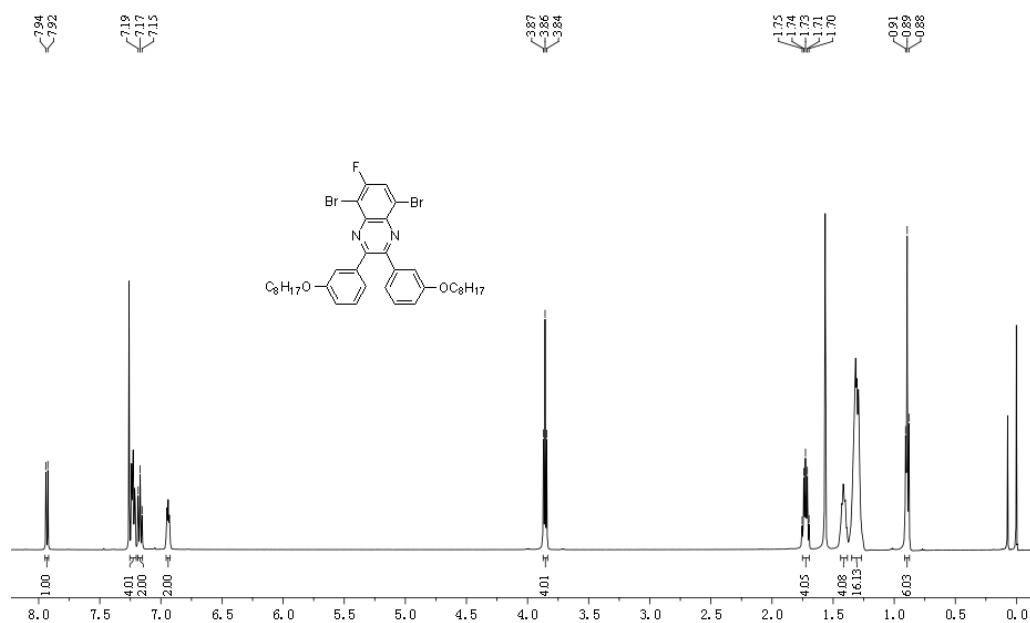

Figure S3.  $^1\text{H}$  NMR spectrum of compound 4.

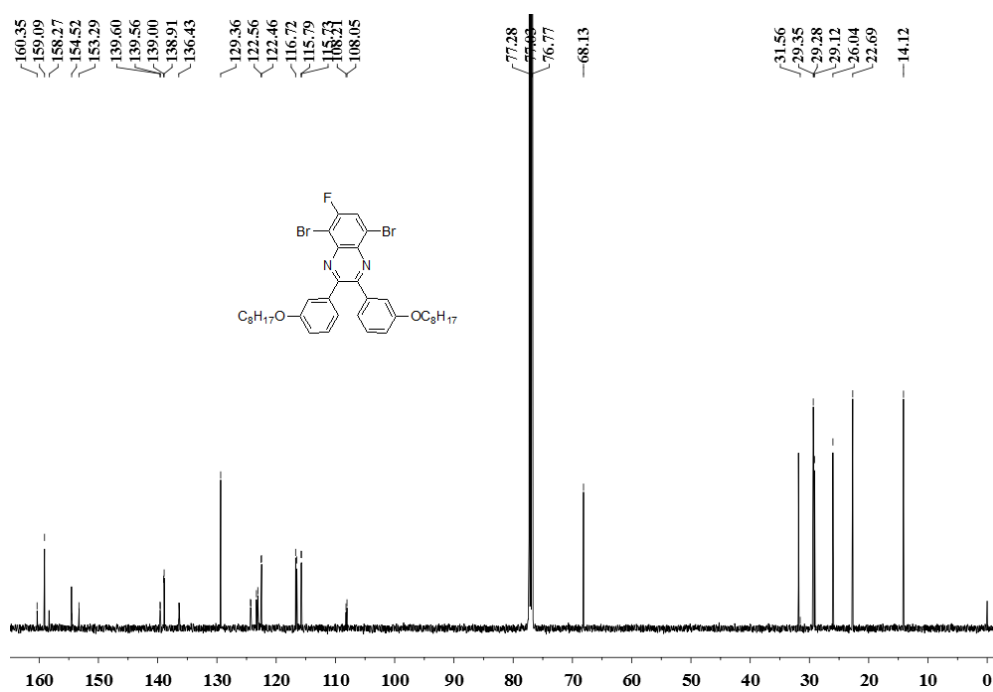

Figure S4.  $^{13}\text{C}$  NMR spectrum of compound 4.

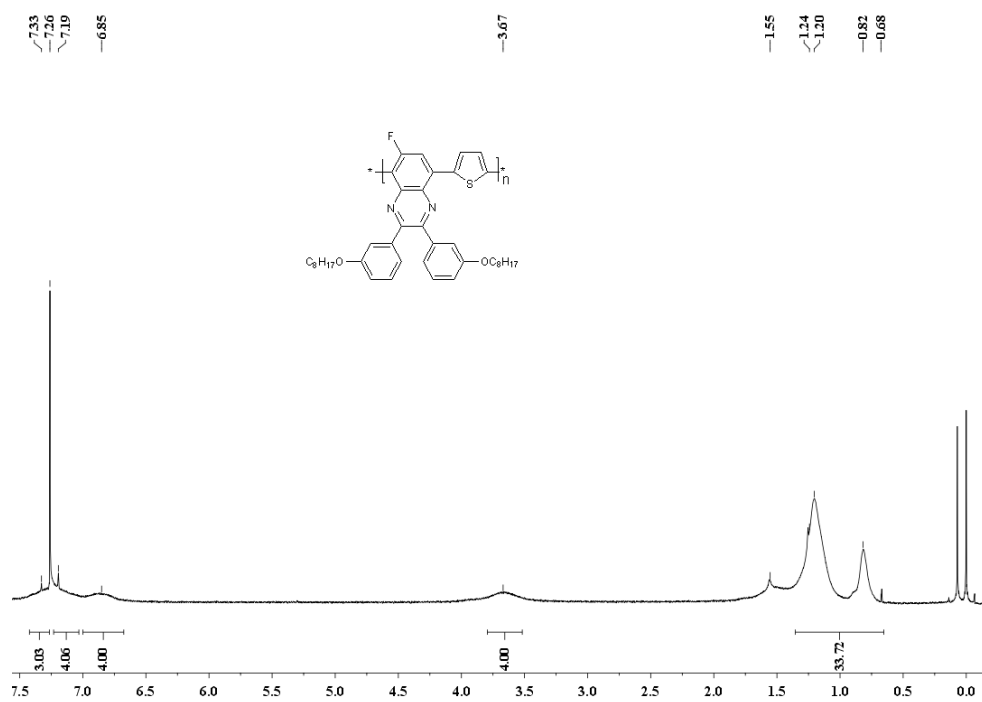

Figure S5. <sup>1</sup>H NMR spectrum of FTQ.

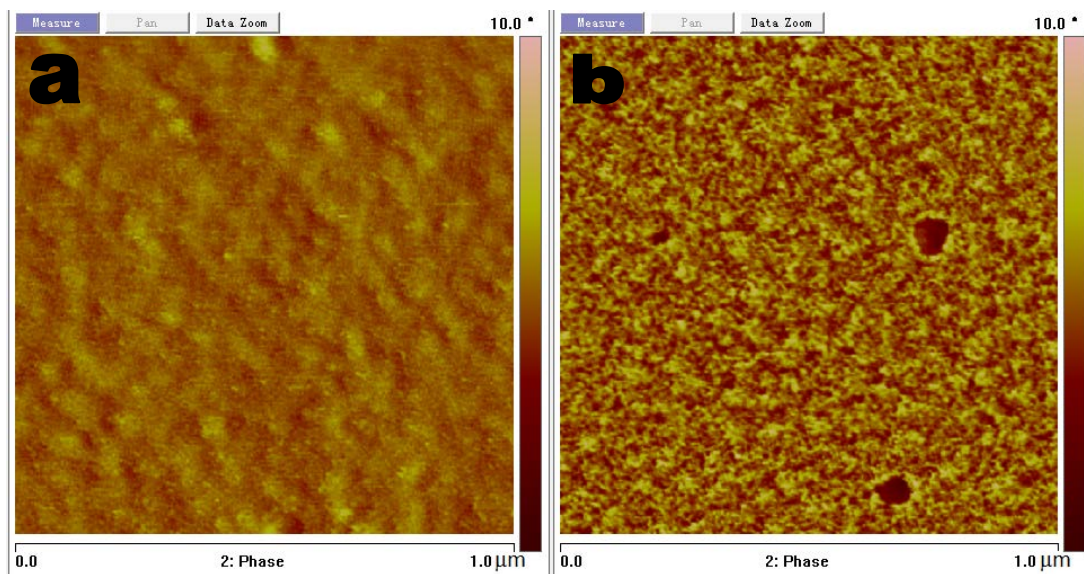

**FigureS6. AFM phase images of blend film with 5 min (a) and 30 min (b) annealing (1 μm × 1 μm).**
